# Supplementary material for: Nanophotonic neural probes for in vivo photostimulation, electrophysiology, and microfluidic delivery
Source: Research Square preprint supplement (doi:10.21203/rs.3.rs-7464471/v1), 2025-09-26
Supplement: Supplementary file 1 [file ee7923522451e1f231e819f4.pdf]

1                   **Nanophotonic neural probes for *in vivo***  
2                   **photostimulation, electrophysiology, and**  
3                   **microfluidic delivery**

4   Xin Mu<sup>1,2,3,\*</sup>, Homeira Moradi Chameh<sup>4</sup>, Mandana Movahed<sup>4</sup>, Fu Der Chen<sup>1,2,3</sup>,  
5       John N. Straguzzi<sup>1</sup>, Piyush Kumar<sup>1</sup>, Andrei Stalmashonak<sup>1</sup>, Hannes Wahn<sup>1</sup>,  
6       Hongyao Chua<sup>5</sup>, Xianshu Luo<sup>5</sup>, Guo-Qiang Lo<sup>5</sup>, Joyce K. S. Poon<sup>2,3</sup>, Taufik A.  
7                   Valiante<sup>2,3,4,6,7</sup>, and Wesley D. Sacher<sup>1,3,\*</sup>

8   <sup>1</sup>Max Planck Institute of Microstructure Physics, Weinberg 2, 06120 Halle, Germany

9   <sup>2</sup>Department of Electrical and Computer Engineering, University of Toronto, 10  
10       King's College Road, Toronto, Ontario M5S 3G4, Canada

11   <sup>3</sup>Max Planck-University of Toronto Centre for Neural Science and Technology,  
12       Toronto, Ontario, Canada

13   <sup>4</sup>Krembil Brain Institute, University Health Network, Toronto, Ontario, Canada

14   <sup>5</sup>Advanced Micro Foundry Pte. Ltd., 11 Science Park Road, Singapore Science Park  
15       II, 117685, Singapore

16   <sup>6</sup>Division of Neurosurgery, Department of Surgery, Toronto Western Hospital,  
17       University of Toronto, Toronto, Ontario, Canada

18   <sup>7</sup>Institute of Biomedical Engineering, University of Toronto, Toronto, Ontario,  
19       Canada

20   \*Corresponding authors: xinmu@mpi-halle.mpg.de, wesley.sacher@mpi-halle.mpg.de

21                   August 26, 2025

## 22 Supplementary Materials

### 23 Multifunctional nanophotonic neural probe system

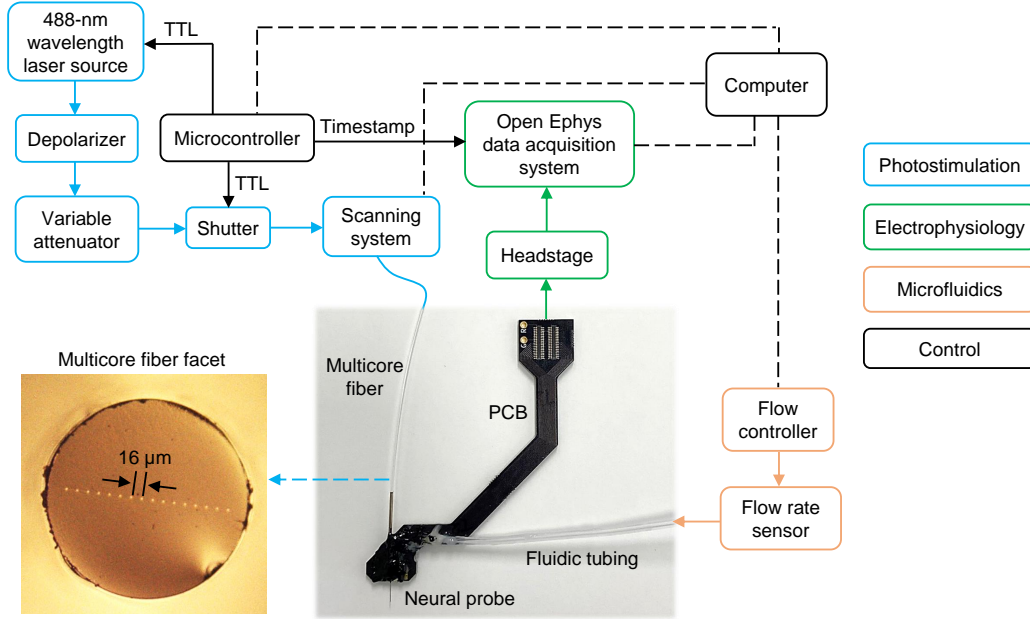

Fig. S1: Schematic of the neural probe system. Laser light is transmitted from a 488-nm wavelength laser source to the neural probe via a depolarizer, variable optical attenuator, optical shutter, optical scanning system, and multicore fiber. The 16-core fiber is aligned and attached to the array of on-chip edge couplers of the neural probe. The scanning system enables selection of the fiber core (and optical emitter) to which light is coupled. The electrophysiological signals recorded by microelectrodes are acquired by an Open Ephys data acquisition system via a headstage and an electrical cable. A microcontroller controls the laser source and the optical shutter with transistor-transistor-logic (TTL) signals, defining the pulse trains for photostimulation. The TTL signals are also transmitted to the Open Ephys system to log the photostimulation timestamps. Fluidic delivery is actuated by a flow controller, with the in-line flow rate sensor capturing flow rates in real time. A laboratory computer provides overall system control through signals sent to the microcontroller, scanning system, and flow controller, while also retrieving recording and timing data from the Open Ephys system. Bottom-left: micrograph of multicore fiber facet. Bottom-middle: photograph of a packaged neural probe.

## 24 Control experiments

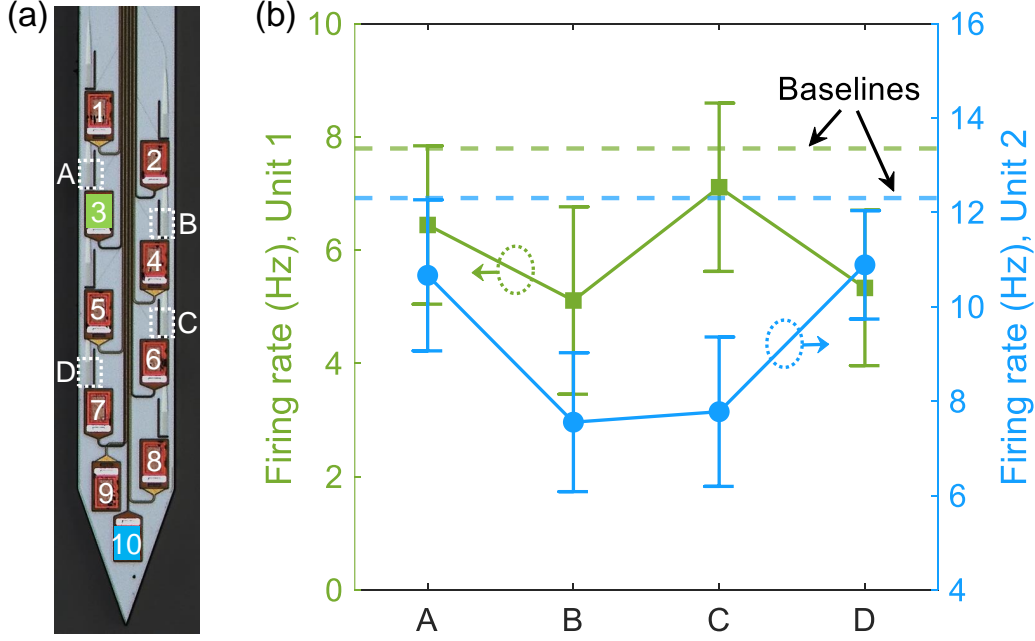

Fig. S2: Photostimulation test in a wild-type mouse. (a) Micrograph of the neural probe shank with selected electrodes and emitters labeled. (b) Mean firing rates of 2 sorted single units (corresponding to electrodes 3 and 10) with photostimulation from 4 emitters (A - D). Mean baseline firing rates were averaged over 10 s before each stimulus. Error bars: standard error of the mean (SEM).

To verify the origin of the evoked spiking response with photostimulation from the neural probe in Section 2.2 (with blue-light-sensitive optogenetic mice), additional photostimulation tests were performed in two wild-type mice (2 to 4 months old). The implant location and photostimulation pattern were identical to Section 2.2, with the exception that a different set of four emitters were selected for sequential addressing (as shown in Fig. S2a). Also similar to Section 2.2, the emission powers ranged from  $\approx 1.0 - 2.4 \mu\text{W}$  across the four emitters.

Figure S2b shows representative results from one of the control experiments, and similar results were observed in the other control experiment. Mean firing rates of two sorted single units (Unit 1 and Unit 2) with photostimulation from the four emitters are shown. Units 1 and 2 were detected on electrodes 3 and 10, respectively. Compared with the baseline firing rate, increases in firing rates during photostimulation were not observed, indicating the photostimulation effects reported in Section 2.2 were of optogenetic origin rather than a result of tissue heating with illumination. Five additional units were sorted in the experiment, and no significant changes in firing rates with photostimulation were observed.

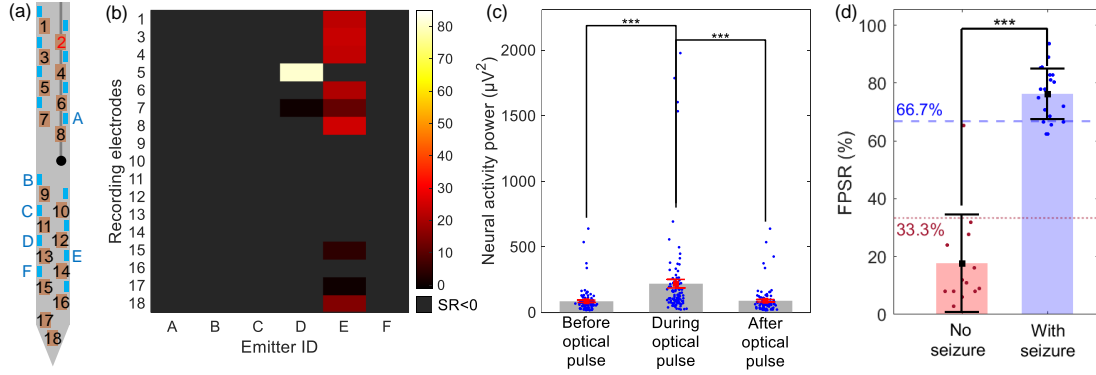

Fig. S3: Control photostimulation tests prior to microfluidic 4-AP injection. (a) Schematic of the probe shank with electrodes and selected emitters labeled. (b) Heatmap of suppression ratios ( $SR$ s) on 17 electrode channels with CW optical pulses from 6 emitters. (c) Neural activity power calculated from LFP signals before, during, and after the optical pulses ( $n=102$ ). (d) Fraction of positive suppression ratios ( $FPSR$ ) in each photostimulation pattern in control tests (before 4-AP injections,  $n=13$ , 4 mice) and in seizure suppression tests (after 4-AP seizure induction,  $n=21$ , 5 mice, repeated from Fig. 6e). The error bars denote standard deviations in panels (c) and (d). One-tailed non-parametric Mann-Whitney test was used in panels (c) and (d). \*\*\* denotes statistical significance with  $p<0.001$ .

In four of the five *in vivo* experiments reported in Section 2.4, the photostimulation pattern was applied repeatedly before the first 4-AP injection. These control tests aimed to confirm the effects of photostimulation prior to the induction of seizure activity. Figure S3 shows the results from one of the four experiments (performed as part of the overall experiment in Fig. 6). The six selected emitters are shown in Fig. S3a and are identical to Fig. 6; the same emission powers were used. The heatmap of suppression ratios ( $SR$ , defined in Section 2.4) during the photostimulation pattern is shown in Fig. S3b. 91 of the data points (emitter-electrode combinations) exhibited  $SR < 0$ , indicating the photostimulation generally excited neural activity prior to the injections of 4-AP. Figure S3c compares the neural activity power before, during, and after the optical pulses. The neural activity power during photostimulation was significantly higher than pre- and post-stimulation, agreeing with the results of Section 2.2 and the expected photostimulation mechanism (excitation of Channelrhodopsin-2-positive pyramidal cells). As in Fig. 6d, neural activity power pre- and post-stimulation were similar. Also, due to the absence of seizure activity, the amplitude of the neural activity power was lower in these control tests compared to Fig. 6d.

Figure S3d summarizes the fraction of positive suppression ratios ( $FPSR$ , defined in Section 2.4) within each photostimulation pattern (trial). The set of control tests (13 trials with 4 mice) is compared to the set of seizure suppression tests in Section 2.4 (21 trials with 5 mice). During seizure suppression tests (following injections of 4-AP), 18 out of 21 trials had  $FPSR \geq 66.7\%$ . By contrast, in the control tests, 12 out of 13 trials exhibited  $FPSR < 33.3\%$ , further indicating a general increase in neural activity with photostimulation prior to 4-AP injections.

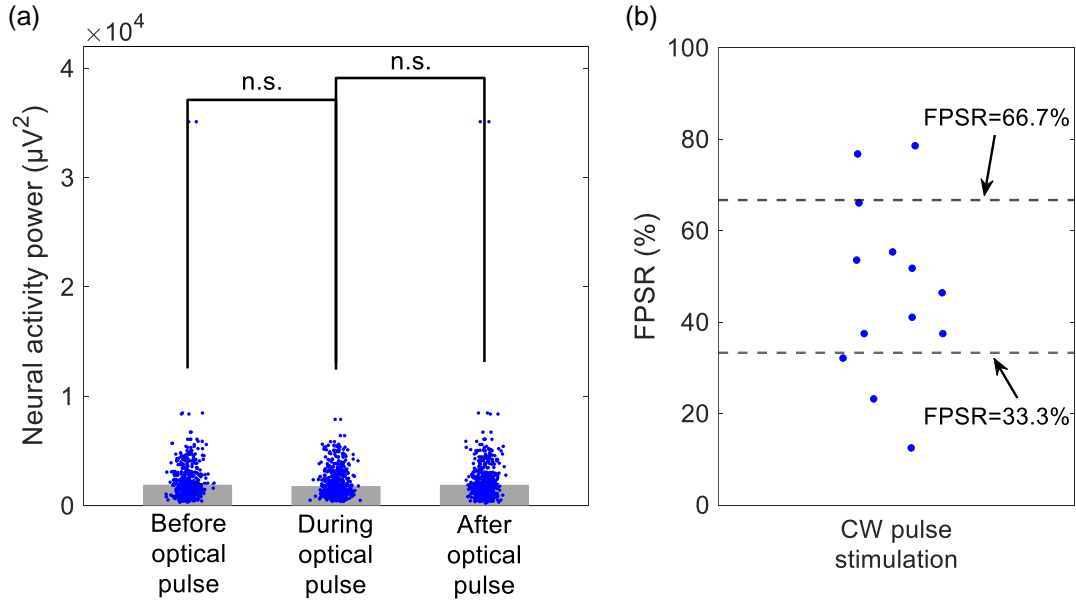

Fig. S4: Seizure suppression tests in wild-type mice. (a) Neural activity power before, during, and after the 10-s continuous-wave optical pulses ( $n=392$ ) in one mouse. The neural activity power was recorded from 14 electrodes during 7 photostimulation trials; light was applied sequentially from 4 emitters during each trial. Two-tailed non-parametric Mann-Whitney test was applied with n.s. denoting no statistical significance with  $p>0.05$ . (b) *FPSRs* calculated across 13 photostimulation trials in 2 wild-type mice. The error bars denote SEM.

Control experiments corresponding to the seizure suppression tests in Section 2.4 were performed on two wild-type mice (2 - 4 months old). The neural probe implant location, composition of the injected solution, and photostimulation pattern (10-s CW pulses emitted in sequence from each of the selected emitters) followed Section 2.4. Relative to Section 2.4, a different neural probe was used for these tests, and the set of selected emitters differed in location and number. Emission powers ranged from  $\approx 1.0 - 4.2 \mu W$ . The neural probe captured LFP signals during seizure activity induced by the microfluidic injections of 4-AP, and Fig. S4 summarizes the recordings before, during, and after each photostimulation pulse. Seven repetitions (trials) of the photostimulation pattern were performed in the first wild-type mouse, and six were performed in the second mouse. At the implant depth of these experiments, 14 electrodes on the neural probe were within the brain. In Fig. S4a, no statistically significant difference was observed in the neural activity power before, during, and after the photostimulation pulses. Figure S4b shows the calculated *FPSRs* (defined in Section 2.4) across all photostimulation trials in both wild-type mice. 61.5% of the trials resulted in  $33.3\% < FPSR < 66.7\%$ , indicating neither clear suppression nor promotion effect of seizure activity. Moreover, with  $FPSR \geq 66.7\%$  corresponding to clear suppression of seizure activity, only 15.4% of the control trials fell in this range, in contrast to 85.7% with the blue-light sensitive optogenetic mice in Section 2.4 — indicating that the local suppression of 4-AP induced seizure with CW optical pulses in Section 2.4 resulted from an optogenetic response instead of tissue heating with photostimulation.

## Tests of low- and high-frequency photostimulation patterns for local seizure suppression

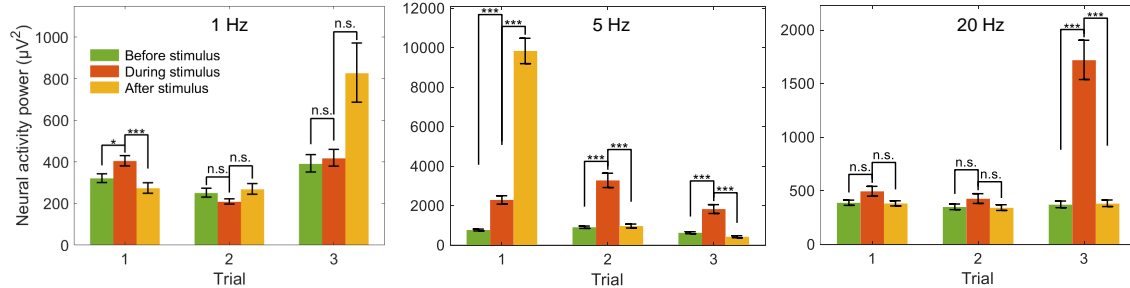

Fig. S5: Neural activity power before, during and after photostimulation pulses at 1 Hz (left), 5 Hz (middle), and 20 Hz (right). Each photostimulation pattern was tested 3 times for each selected emitters during the experiment (trials 1 - 3). The error bars denote SEM. Two-tailed non-parametric Mann-Whitney test was applied with \*\*\* denoting statistical significance with  $p < 0.001$  and \* for  $p < 0.05$ , n.s. stands for no statistical significance with  $p \geq 0.05$ .

In addition to the CW photostimulation pattern tested in Section 2.4, additional photostimulation patterns from neural probes were tested for seizure suppression following microfluidic injections of 4-AP (with the same procedure of Section 2.4). These tests spanned low- (1 Hz and 5 Hz) and high- (20 Hz) frequency photostimulation pulse trains. The parameters of the three additional photostimulation patterns are summarized in Table S1; three different probes were used across the tests, and the number of selected emitters also varied. Three repeats of the pattern were performed for each selected emitter (trials 1 - 3). Figure S5 compares the neural activity power before, during, and after each stimulation pattern (calculated across all electrodes, as in Section 2.4). All tests were performed during seizure activity. Overall, no reduction in neural activity power during photostimulation (i.e. seizure suppression) was observed across the three additional photostimulation patterns.

Table S1: Summary of low- and high-frequency photostimulation patterns (adapted from the references listed).

| Frequency (Hz) | Pulse width (ms) | Recovery time (s) | Number of pulses | Number of emitters | Emission power range (μW) | Ref. |
|----------------|------------------|-------------------|------------------|--------------------|---------------------------|------|
| 1              | 5                | 120               | 120              | 4                  | ≈4.3 - 5.3                | [1]  |
| 5              | 50               | 120               | 600              | 1                  | ≈3                        | [2]  |
| 20             | 5                | 5                 | 200              | 1                  | ≈7.8                      | [3]  |

## References

- Ladas, T. P., Chiang, C.-C., Gonzalez-Reyes, L. E., Nowak, T. & Durand, D. M. Seizure reduction through interneuron-mediated entrainment using low frequency optical stimulation. *Exp. Neurol.* **269**, 120–132 (2015).

- 95 2. Soper, C., Wicker, E., Kulick, C. V., N’Gouemo, P. & Forcelli, P. A. Optogenetic activation of  
96 superior colliculus neurons suppresses seizures originating in diverse brain networks. *Neurobiol.*  
97 *Disease* **87**, 102–115 (2016).
- 98 3. Chiang, C.-C., Ladas, T. P., Gonzalez-Reyes, L. E. & Durand, D. M. Seizure suppression by  
99 high frequency optogenetic stimulation using *in vitro* and *in vivo* animal models of epilepsy.  
100 *Brain Stimul.* **7**, 890–899 (2014).
